# Supplementary material for: A novel regional irrigation water productivity model forcomplex cropping patterns in arid regions coupling soilwater and salinity dynamics, irrigation and drainage, andshallow groundwater movement
Source: Copernicus journal article supplement (doi:10.5194/hess-2019-359), 2019-08-12
Supplement: Supplementary file 1 [file hess-2019-359-supplement.pdf]

Supplement of

**A novel regional irrigation water productivity model for complex cropping patterns in arid regions coupling soil water and salinity dynamics, irrigation and drainage, and shallow groundwater movement**

Jingyuan Xue<sup>1</sup>, Zailin Huo<sup>1\*</sup>, Ian White<sup>2</sup>, Isaya Kisekka<sup>3</sup>, Zhuping Sheng<sup>4</sup>, Shuai Wang<sup>1</sup>, Chaozi Wang<sup>1</sup>, Guanhua Huang<sup>1</sup>, Xu Xu<sup>1</sup>

<sup>1</sup>College of Water Resource and Civil Engineering, China Agricultural University, Beijing 100083, China. <sup>2</sup>Fenner School of Environment & Society, Australian National University, Fenner Building 141 Canberra ACT 0200. <sup>3</sup>University of California Davis, Department of Land, Air and Water Resources and Department of Biological and Agricultural Engineering. <sup>4</sup>Texas A&M University, Agriculture Research and Extension Center, El Paso, USA

\* Correspondence to: Zailin Huo (huozl@cau.edu.cn)

**Contents of this file**

Figure S1 to Figure S3

**Figure Captions**

**Fig.S1.** The representation of (a) regional HRUs division and (b) groundwater boundary condition division.

**Fig.S2.** Spatial distribution and their control zones of main and sub-main (a) canals and (b) drainage ditches.

**Fig.S3.** Comparison of the simulated and remote sensing cumulative ET during the crop growing

season in the years of 2006-2013.

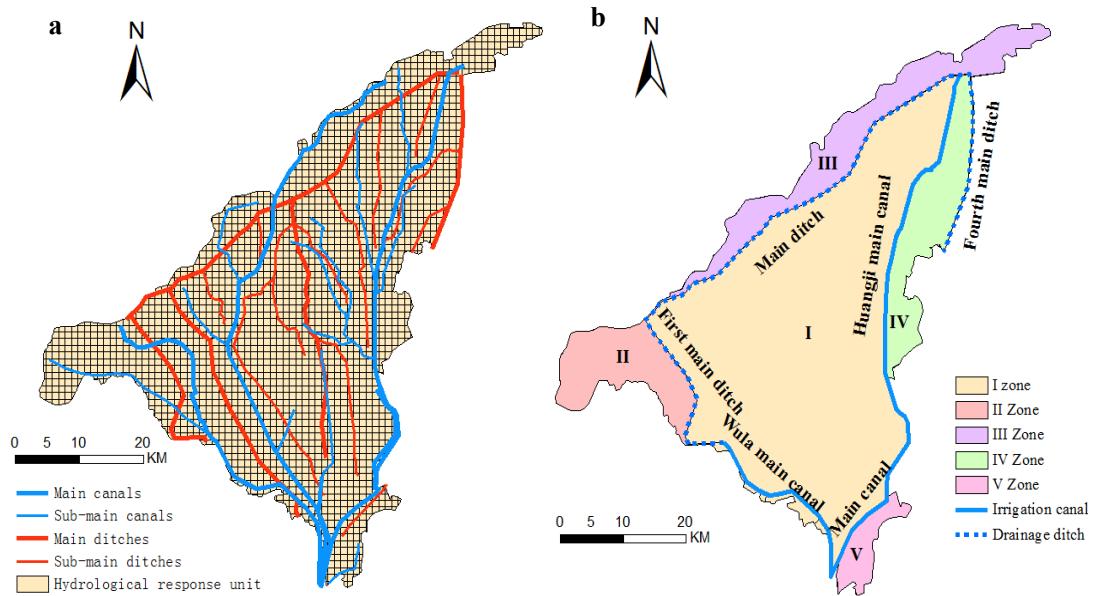

**Fig.S1.** The representation of (a) regional HRUs division and (b) groundwater boundary condition division.

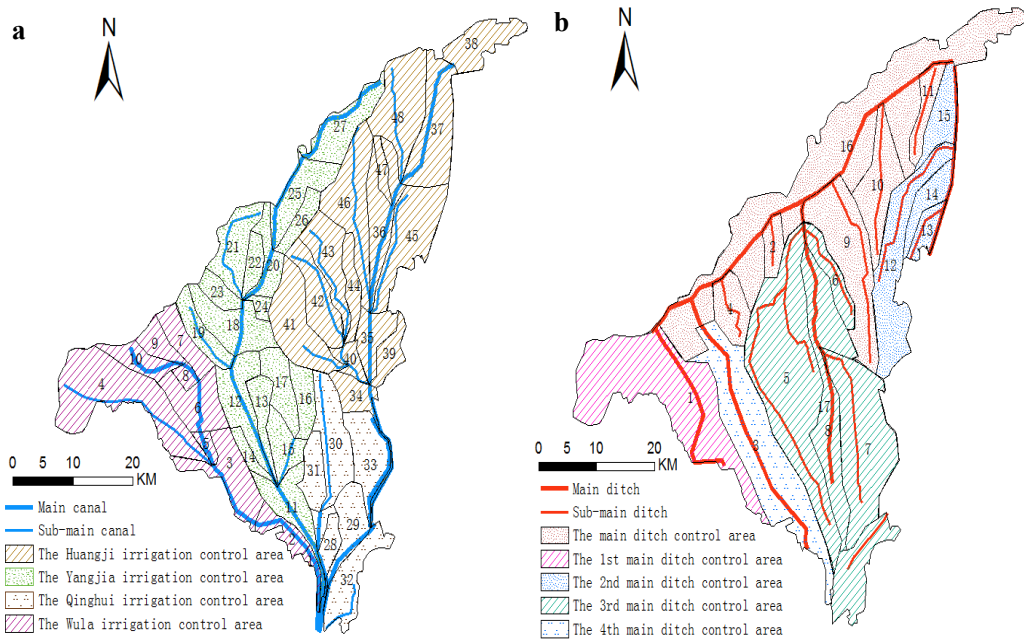

**Fig.S2.** Spatial distribution and their control zones of main and sub-main (a) canals and (b) drainage ditches.

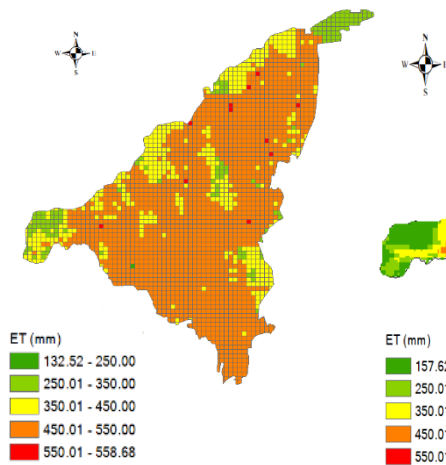

a- Simulated ET (2006)

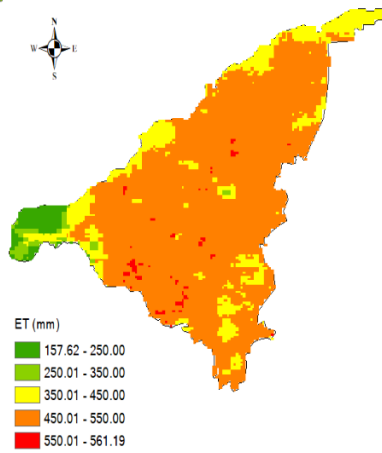

b- Remote sensing ET (2006)

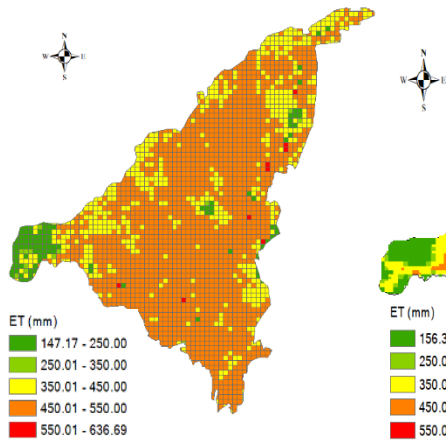

c- Simulated ET (2007)

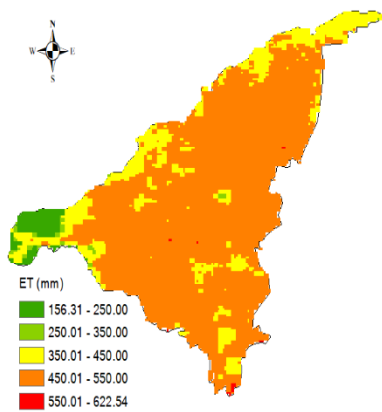

d- Remote sensing ET (2007)

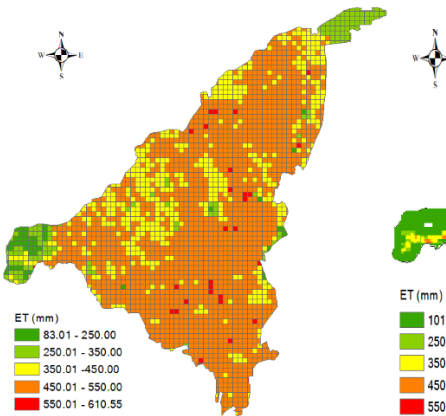

e- Simulated ET (2008)

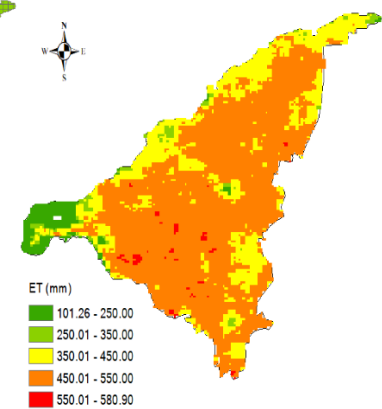

f- Remote sensing ET (2008)

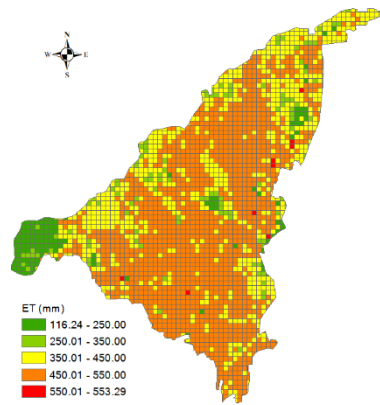

g- Simulated ET (2009)

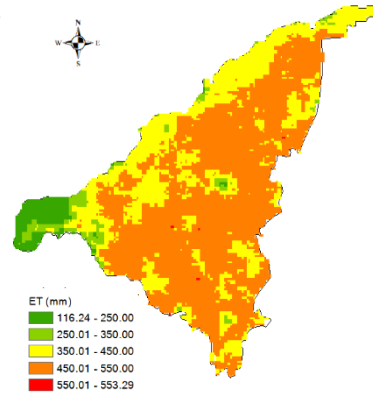

h- Remote sensing ET (2009)

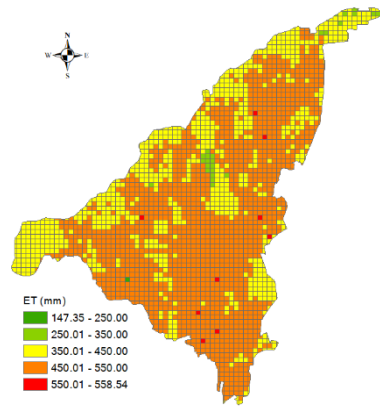

i- Simulated ET (2010)

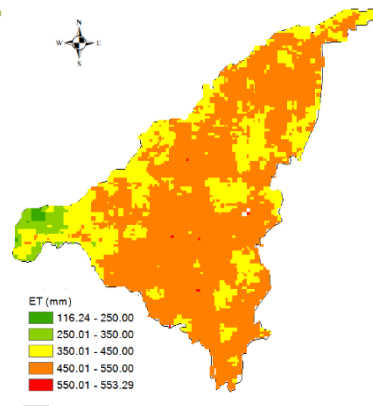

j- Remote sensing ET (2010)

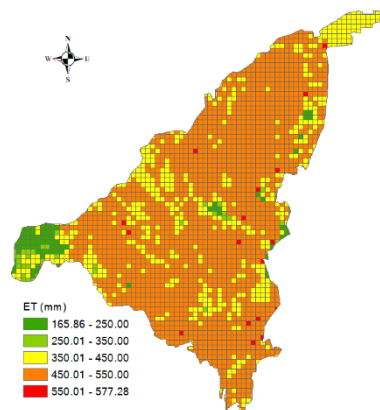

k- Simulated ET (2011)

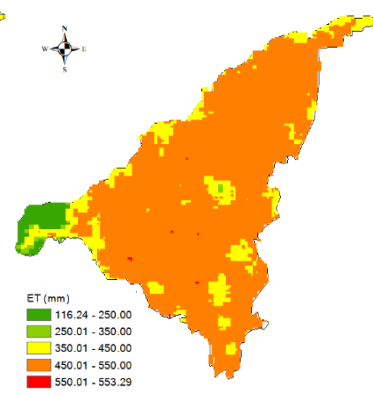

l-Remote sensing ET (2011)

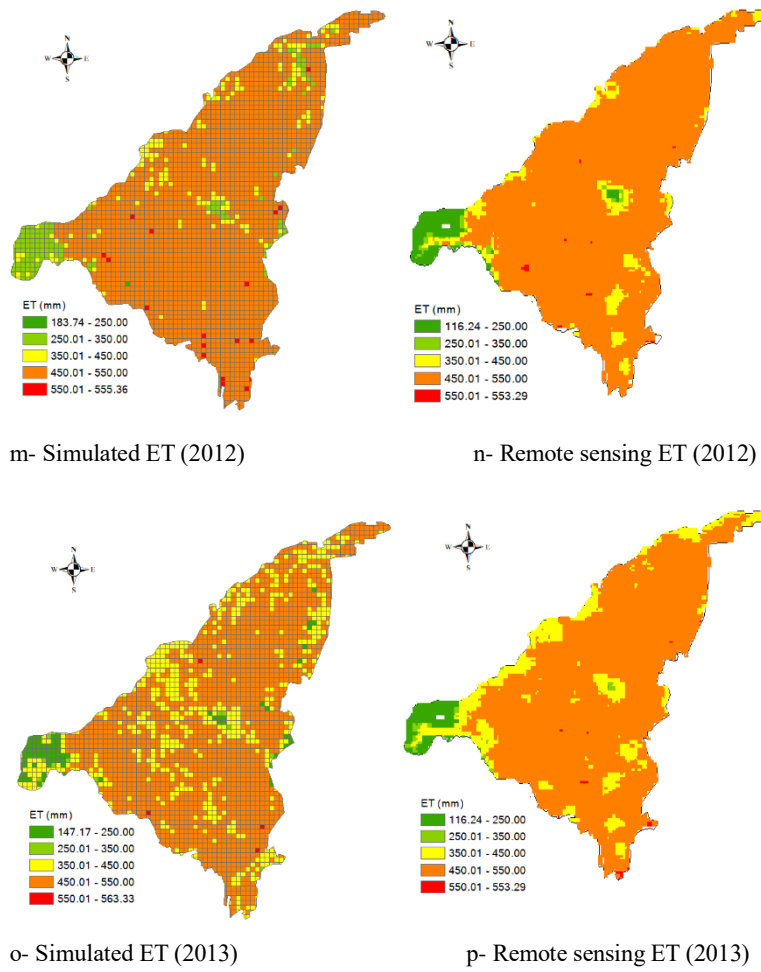

**Fig.S3.** Comparison of the simulated and remote sensing cumulative ET during the crop growing season in the years of 2006-2013.
